# Supplementary material for: Nutrient Homeostasis of Aegilops Accessions Differing in B Tolerance Level under Boron Toxic Growth Conditions
Source: MDPI journal article supplement (doi:10.3390/biology11081094), 2022-07-22
Supplement: s1 [file s1]

### *Supplementary Material*

Supplementary Table S1: Means (in mg plant<sup>-1</sup>) of the RP (root phosphorus), SP (shoot phosphorus), RNa (root sodium), and SNa (shoot sodium) uptake of 19 Aegilops accessions and the B tolerant check cultivar, Bolal 2973 grown under Control (3.1 µM B), toxic B (10 ppm B) and highly toxic B (100 ppm B) .

| Code         | Shoot Phosphorus |        |         | Root Phosphorus |        |         | Shoot Sodium |        |         | Root Sodium |        |         |
|--------------|------------------|--------|---------|-----------------|--------|---------|--------------|--------|---------|-------------|--------|---------|
|              | Control          | 10 ppm | 100 ppm | Control         | 10 ppm | 100 ppm | Control      | 10 ppm | 100 ppm | Control     | 10 ppm | 100 ppm |
| <b>Ab1</b>   | 0.229            | 0.177  | 0.179   | 0.108           | 0.094  | 0.155   | 0.017        | 0.046  | 0.030   | 0.021       | 0.020  | 0.042   |
| <b>Ab2</b>   | 0.255            | 0.298  | 0.267   | 0.000           | 0.018  | 0.036   | 0.013        | 0.035  | 0.030   | 0.007       | 0.005  | 0.016   |
| <b>Ab3</b>   | 0.233            | 0.173  | 0.199   | 0.076           | 0.123  | 0.147   | 0.016        | 0.014  | 0.022   | 0.009       | 0.016  | 0.042   |
| <b>Ac1</b>   | 0.535            | 0.826  | 0.301   | 0.147           | 0.149  | 0.037   | 0.017        | 0.032  | 0.037   | 0.060       | 0.040  | 0.019   |
| <b>Ac2</b>   | 0.299            | 0.361  | 0.293   | 0.099           | 0.031  | 0.024   | 0.016        | 0.030  | 0.017   | 0.014       | 0.010  | 0.011   |
| <b>Ac3</b>   | 0.325            | 0.259  | 0.200   | 0.103           | 0.051  | 0.025   | 0.029        | 0.019  | 0.038   | 0.059       | 0.027  | 0.019   |
| <b>Ac4</b>   | 0.362            | 0.276  | 0.718   | 0.168           | 0.103  | 0.083   | 0.017        | 0.018  | 0.040   | 0.019       | 0.023  | 0.045   |
| <b>Ac5</b>   | 0.229            | 0.225  | 0.127   | 0.082           | 0.056  | 0.028   | 0.011        | 0.014  | 0.015   | 0.039       | 0.019  | 0.023   |
| <b>As1</b>   | 0.121            | 0.077  | 0.093   | 0.058           | 0.021  | 0.017   | 0.012        | 0.011  | 0.029   | 0.046       | 0.027  | 0.018   |
| <b>As2</b>   | 0.236            | 0.126  | 0.088   | 0.084           | 0.036  | 0.015   | 0.036        | 0.011  | 0.025   | 0.053       | 0.019  | 0.016   |
| <b>Al1</b>   | 0.116            | 0.125  | 0.117   | 0.023           | 0.036  | 0.020   | 0.011        | 0.012  | 0.019   | 0.012       | 0.026  | 0.014   |
| <b>Al2</b>   | 0.257            | 0.285  | 0.117   | 0.072           | 0.077  | 0.022   | 0.015        | 0.024  | 0.019   | 0.046       | 0.061  | 0.020   |
| <b>At1</b>   | 0.238            | 0.193  | 0.154   | 0.028           | 0.041  | 0.034   | 0.010        | 0.010  | 0.020   | 0.008       | 0.007  | 0.016   |
| <b>At2</b>   | 0.138            | 0.241  | 0.181   | 0.043           | 0.078  | 0.043   | 0.009        | 0.020  | 0.022   | 0.009       | 0.031  | 0.020   |
| <b>At3</b>   | 0.390            | 0.202  | 0.139   | 0.065           | 0.043  | 0.030   | 0.024        | 0.016  | 0.038   | 0.034       | 0.014  | 0.028   |
| <b>At4</b>   | 0.487            | 0.537  | 0.250   | 0.128           | 0.101  | 0.054   | 0.018        | 0.025  | 0.024   | 0.025       | 0.016  | 0.021   |
| <b>Au1</b>   | 0.184            | 0.226  | 0.179   | 0.044           | 0.066  | 0.034   | 0.014        | 0.017  | 0.027   | 0.020       | 0.021  | 0.029   |
| <b>Au2</b>   | 0.174            | 0.315  | 0.267   | 0.083           | 0.123  | 0.048   | 0.007        | 0.015  | 0.031   | 0.018       | 0.021  | 0.020   |
| <b>Au3</b>   | 0.148            | 0.196  | 0.141   | 0.073           | 0.095  | 0.037   | 0.011        | 0.019  | 0.036   | 0.025       | 0.031  | 0.040   |
| <b>Bolal</b> | 0.602            | 0.581  | 0.593   | 0.132           | 0.126  | 0.075   | 0.037        | 0.038  | 0.075   | 0.048       | 0.038  | 0.044   |

Supplementary Table S2: Means (in mg plant<sup>-1</sup>) of the RMg (root magnesium) and SMg (shoot magnesium) uptake, and the means (in µg plant<sup>-1</sup>) of RMn (root manganese), and SMn (shoot manganese) uptake of 19 Aegilops accessions and the B tolerant check cultivar, Bolal 2973 grown under Control (3.1 µM B), toxic B (10 ppm B) and highly toxic B (100 ppm B).

| Code  | Shoot Magnesium |        |         | Root Magnesium |        |         | Shoot Manganese |        |         | Root Manganese |        |         |
|-------|-----------------|--------|---------|----------------|--------|---------|-----------------|--------|---------|----------------|--------|---------|
|       | Control         | 10 ppm | 100 ppm | Control        | 10 ppm | 100 ppm | Control         | 10 ppm | 100 ppm | Control        | 10 ppm | 100 ppm |
| Ab1   | 0.083           | 0.079  | 0.069   | 0.025          | 0.023  | 0.024   | 0.99            | 0.97   | 0.94    | 0.51           | 0.58   | 0.42    |
| Ab2   | 0.094           | 0.100  | 0.084   | 0.018          | 0.005  | 0.009   | 1.20            | 1.43   | 1.18    | 0.31           | 0.11   | 0.15    |
| Ab3   | 0.097           | 0.074  | 0.074   | 0.025          | 0.032  | 0.036   | 1.13            | 0.89   | 0.92    | 0.41           | 0.59   | 0.61    |
| Ac1   | 0.105           | 0.171  | 0.070   | 0.063          | 0.066  | 0.013   | 5.21            | 6.59   | 2.57    | 1.02           | 1.13   | 0.62    |
| Ac2   | 0.090           | 0.114  | 0.084   | 0.025          | 0.009  | 0.005   | 1.96            | 2.10   | 1.27    | 0.38           | 0.17   | 0.08    |
| Ac3   | 0.078           | 0.063  | 0.063   | 0.025          | 0.022  | 0.014   | 2.75            | 2.37   | 2.20    | 2.08           | 0.98   | 0.81    |
| Ac4   | 0.123           | 0.081  | 0.166   | 0.054          | 0.042  | 0.027   | 2.46            | 2.07   | 4.10    | 1.02           | 0.81   | 0.44    |
| Ac5   | 0.062           | 0.071  | 0.042   | 0.034          | 0.024  | 0.012   | 3.53            | 3.72   | 2.02    | 0.76           | 0.57   | 0.81    |
| As1   | 0.042           | 0.028  | 0.042   | 0.024          | 0.013  | 0.009   | 1.58            | 0.91   | 1.07    | 1.60           | 0.67   | 0.40    |
| As2   | 0.062           | 0.027  | 0.029   | 0.033          | 0.018  | 0.010   | 2.67            | 1.05   | 0.85    | 1.31           | 0.96   | 0.38    |
| Al1   | 0.036           | 0.033  | 0.035   | 0.009          | 0.014  | 0.007   | 1.45            | 1.33   | 1.07    | 0.54           | 1.50   | 0.59    |
| Al2   | 0.071           | 0.082  | 0.037   | 0.022          | 0.027  | 0.008   | 3.41            | 3.60   | 1.65    | 2.24           | 3.23   | 0.89    |
| At1   | 0.050           | 0.038  | 0.038   | 0.006          | 0.010  | 0.011   | 1.93            | 1.80   | 1.41    | 0.46           | 0.72   | 0.78    |
| At2   | 0.039           | 0.069  | 0.042   | 0.011          | 0.027  | 0.013   | 1.93            | 3.30   | 1.78    | 0.76           | 1.78   | 1.08    |
| At3   | 0.099           | 0.044  | 0.040   | 0.026          | 0.019  | 0.017   | 4.41            | 1.84   | 0.98    | 1.04           | 0.72   | 0.39    |
| At4   | 0.086           | 0.094  | 0.057   | 0.040          | 0.022  | 0.027   | 2.86            | 3.23   | 1.57    | 0.88           | 0.62   | 0.80    |
| Au1   | 0.050           | 0.056  | 0.045   | 0.017          | 0.022  | 0.011   | 1.81            | 2.49   | 1.55    | 0.35           | 0.30   | 0.32    |
| Au2   | 0.047           | 0.078  | 0.059   | 0.029          | 0.036  | 0.014   | 1.99            | 3.54   | 1.77    | 0.59           | 0.75   | 0.54    |
| Au3   | 0.055           | 0.078  | 0.062   | 0.029          | 0.054  | 0.020   | 2.19            | 2.18   | 2.11    | 0.43           | 0.68   | 0.88    |
| Bolal | 0.134           | 0.124  | 0.177   | 0.034          | 0.032  | 0.018   | 4.49            | 4.27   | 4.71    | 2.73           | 2.04   | 3.64    |

Supplementary Table S3: Means (in  $\mu\text{g plant}^{-1}$ ) of the RCu (root copper), SCu (shoot copper), RB (root boron), and SB (shoot boron uptake of 19 Aegilops accessions and the B tolerant check cultivar, Bolal 2973 grown under Control (3.1  $\mu\text{M B}$ ), toxic B (10 ppm B) and highly toxic B (100 ppm B).

| Code  | Shoot Copper |        |         | Root Copper |        |         | Shoot Boron |        |         | Root Boron |        |         |
|-------|--------------|--------|---------|-------------|--------|---------|-------------|--------|---------|------------|--------|---------|
|       | Control      | 10 ppm | 100 ppm | Control     | 10 ppm | 100 ppm | Control     | 10 ppm | 100 ppm | Control    | 10 ppm | 100 ppm |
| Ab1   | 2.60         | 4.34   | 0.98    | 5.21        | 4.44   | 5.34    | 0.61        | 16.59  | 83.01   | 0.33       | 1.52   | 16.97   |
| Ab2   | 2.66         | 2.56   | 1.18    | 2.65        | 0.69   | 1.19    | 0.51        | 18.51  | 131.24  | 0.07       | 0.21   | 3.78    |
| Ab3   | 2.41         | 1.43   | 0.82    | 3.35        | 4.48   | 5.26    | 0.53        | 15.93  | 105.71  | 0.11       | 1.87   | 17.80   |
| Ac1   | 1.52         | 1.98   | 0.84    | 3.49        | 3.40   | 1.28    | 0.81        | 35.02  | 101.48  | 0.32       | 2.03   | 3.26    |
| Ac2   | 1.60         | 2.00   | 0.90    | 3.84        | 1.14   | 0.65    | 0.55        | 13.15  | 130.97  | 0.06       | 0.64   | 2.36    |
| Ac3   | 3.19         | 0.87   | 0.97    | 1.13        | 1.49   | 1.24    | 0.55        | 10.64  | 66.36   | 0.10       | 0.39   | 1.62    |
| Ac4   | 2.75         | 1.30   | 1.64    | 7.82        | 5.84   | 4.07    | 0.56        | 16.27  | 295.62  | 0.14       | 2.24   | 15.46   |
| Ac5   | 0.77         | 0.76   | 0.69    | 1.97        | 1.17   | 1.44    | 0.71        | 18.54  | 52.25   | 0.14       | 0.60   | 1.63    |
| As1   | 0.69         | 0.59   | 0.90    | 0.72        | 0.95   | 1.05    | 0.28        | 4.88   | 49.72   | 0.08       | 0.16   | 1.38    |
| As2   | 1.68         | 0.48   | 1.11    | 2.18        | 1.25   | 1.15    | 0.30        | 4.97   | 30.52   | 0.15       | 0.55   | 1.47    |
| Al1   | 0.67         | 0.62   | 0.57    | 0.56        | 1.54   | 1.01    | 0.45        | 4.56   | 42.65   | 0.03       | 0.27   | 0.75    |
| Al2   | 0.99         | 1.27   | 0.82    | 2.59        | 2.27   | 1.20    | 0.60        | 13.73  | 55.60   | 0.13       | 0.67   | 0.98    |
| At1   | 0.61         | 0.59   | 0.87    | 0.56        | 0.82   | 0.91    | 0.40        | 7.84   | 43.57   | 0.05       | 0.25   | 1.95    |
| At2   | 0.51         | 0.96   | 0.74    | 1.37        | 2.50   | 1.16    | 0.51        | 7.78   | 52.52   | 0.08       | 0.50   | 1.46    |
| At3   | 1.47         | 0.92   | 0.71    | 1.70        | 1.16   | 1.18    | 0.77        | 8.52   | 72.95   | 0.22       | 0.48   | 5.91    |
| At4   | 1.21         | 1.38   | 0.75    | 1.24        | 0.57   | 0.95    | 0.63        | 23.45  | 73.71   | 0.13       | 1.30   | 3.31    |
| Au1   | 0.88         | 1.18   | 0.63    | 1.14        | 1.50   | 1.25    | 0.33        | 9.89   | 74.23   | 0.13       | 0.48   | 3.34    |
| Au2   | 0.53         | 1.14   | 0.83    | 1.45        | 1.52   | 0.63    | 0.30        | 19.35  | 106.75  | 0.08       | 0.92   | 3.97    |
| Au3   | 0.71         | 0.94   | 1.00    | 1.26        | 1.46   | 1.63    | 0.46        | 19.95  | 84.30   | 0.19       | 1.49   | 2.59    |
| Bolal | 0.79         | 0.71   | 0.94    | 1.24        | 0.86   | 0.89    | 1.18        | 17.31  | 129.68  | 0.52       | 1.04   | 6.04    |

Supplementary Table S4: Means of the RDW (root dry weight), SDW (shoot dry weight), and the means (in mg plant<sup>-1</sup>) of RCa (root calcium) uptake, and SCa (shoot calcium) uptake of 19 Aegilops accessions and the B tolerant check cultivar, Bolal 2973 grown under Control (3.1 µM B), toxic B (10 ppm B) and highly toxic B (100 ppm B).

| Code         | Shoot Dry Weight |        |         | Root Dry Weight |        |         | Shoot Calcium |        |         | Root Calcium |        |         |
|--------------|------------------|--------|---------|-----------------|--------|---------|---------------|--------|---------|--------------|--------|---------|
|              | Control          | 10 ppm | 100 ppm | Control         | 10 ppm | 100 ppm | Control       | 10 ppm | 100 ppm | Control      | 10 ppm | 100 ppm |
| <b>Ab1</b>   | 0.030            | 0.033  | 0.032   | 0.009           | 0.008  | 0.007   | 0.153         | 0.167  | 0.128   | 0.050        | 0.049  | 0.062   |
| <b>Ab2</b>   | 0.027            | 0.035  | 0.039   | 0.009           | 0.011  | 0.008   | 0.184         | 0.219  | 0.163   | 0.028        | 0.010  | 0.021   |
| <b>Ab3</b>   | 0.034            | 0.030  | 0.033   | 0.010           | 0.009  | 0.007   | 0.180         | 0.132  | 0.130   | 0.049        | 0.048  | 0.065   |
| <b>Ac1</b>   | 0.043            | 0.046  | 0.040   | 0.015           | 0.014  | 0.008   | 0.200         | 0.278  | 0.141   | 0.169        | 0.152  | 0.048   |
| <b>Ac2</b>   | 0.040            | 0.043  | 0.033   | 0.012           | 0.012  | 0.007   | 0.150         | 0.196  | 0.135   | 0.043        | 0.022  | 0.011   |
| <b>Ac3</b>   | 0.026            | 0.024  | 0.018   | 0.006           | 0.006  | 0.002   | 0.198         | 0.145  | 0.154   | 0.088        | 0.068  | 0.080   |
| <b>Ac4</b>   | 0.029            | 0.036  | 0.036   | 0.009           | 0.009  | 0.008   | 0.190         | 0.150  | 0.305   | 0.065        | 0.050  | 0.055   |
| <b>Ac5</b>   | 0.031            | 0.033  | 0.024   | 0.011           | 0.010  | 0.006   | 0.135         | 0.140  | 0.086   | 0.093        | 0.062  | 0.053   |
| <b>As1</b>   | 0.018            | 0.018  | 0.010   | 0.007           | 0.005  | 0.002   | 0.123         | 0.092  | 0.129   | 0.071        | 0.065  | 0.055   |
| <b>As2</b>   | 0.018            | 0.018  | 0.014   | 0.006           | 0.005  | 0.003   | 0.233         | 0.083  | 0.138   | 0.218        | 0.064  | 0.095   |
| <b>Al1</b>   | 0.012            | 0.013  | 0.010   | 0.003           | 0.003  | 0.002   | 0.099         | 0.088  | 0.083   | 0.019        | 0.078  | 0.043   |
| <b>Al2</b>   | 0.029            | 0.028  | 0.015   | 0.009           | 0.007  | 0.003   | 0.172         | 0.203  | 0.119   | 0.071        | 0.082  | 0.068   |
| <b>At1</b>   | 0.030            | 0.021  | 0.020   | 0.008           | 0.005  | 0.004   | 0.109         | 0.085  | 0.116   | 0.031        | 0.034  | 0.077   |
| <b>At2</b>   | 0.022            | 0.023  | 0.021   | 0.006           | 0.006  | 0.005   | 0.077         | 0.142  | 0.103   | 0.030        | 0.072  | 0.047   |
| <b>At3</b>   | 0.034            | 0.019  | 0.020   | 0.008           | 0.004  | 0.003   | 0.249         | 0.120  | 0.101   | 0.117        | 0.080  | 0.106   |
| <b>At4</b>   | 0.041            | 0.042  | 0.032   | 0.012           | 0.011  | 0.004   | 0.200         | 0.221  | 0.117   | 0.074        | 0.059  | 0.043   |
| <b>Au1</b>   | 0.026            | 0.022  | 0.024   | 0.008           | 0.007  | 0.005   | 0.132         | 0.164  | 0.102   | 0.077        | 0.100  | 0.060   |
| <b>Au2</b>   | 0.033            | 0.038  | 0.028   | 0.015           | 0.015  | 0.006   | 0.103         | 0.187  | 0.135   | 0.074        | 0.063  | 0.040   |
| <b>Au3</b>   | 0.029            | 0.034  | 0.025   | 0.012           | 0.015  | 0.006   | 0.130         | 0.156  | 0.158   | 0.085        | 0.120  | 0.105   |
| <b>Bolal</b> | 0.053            | 0.042  | 0.053   | 0.011           | 0.009  | 0.007   | 0.221         | 0.223  | 0.353   | 0.119        | 0.103  | 0.088   |
